# Supplementary material for: FT-IR Spectral Signature of Sensitive and Multidrug-Resistant Osteosarcoma Cell-Derived Extracellular Nanovesicles
Source: MDPI journal article supplement (doi:10.3390/cells11050778), 2022-02-23
Supplement: s1 [file s1]

**Figure S1.** FT-IR/ATR spectra of PBS.

**Figure S2.** Reproducibility of FT-IR curves. In the graph, two aliquots from one same sample were analyzed to assess intra-sample variability.

**Figure S3.** FT-IR/ATR spectra of 143B cells derived- EVs. Spectra of EVs after scaling with respect to the band at 1649  $\text{cm}^{-1}$  (zooms in the protein areas)

**Figure S4.** MSC-derived extracellular nanovesicles (EVs) characterization. (a) Representative transmission electron microscopy images of EVs, isolated from medium conditioned by MSC cells (scale bar: 100 nm). (b) Protein content-based EVs characterization was assessed by Western blot analysis for the expression of transmembrane proteins and cytosolic protein.
