# Supplementary figures and images for: FT-IR Spectral Signature of Sensitive and Multidrug-Resistant Osteosarcoma Cell-Derived Extracellular Nanovesicles
Source: MDPI journal article supplement (doi:10.3390/cells11050778), 2022-02-23

a

EVs MSC

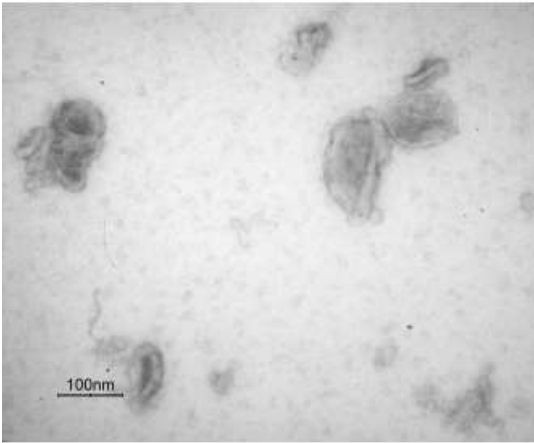

b

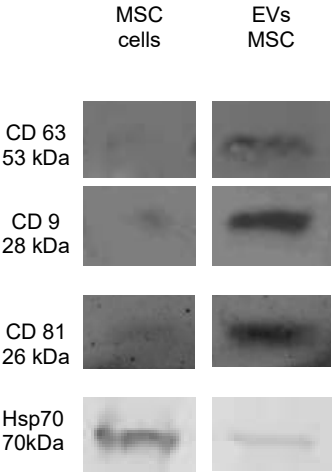

Supplement: s1 [file s1]
